# Supplementary material for: Ethylene-bridged polysilsesquioxane/hollow silica particle hybrid film for thermal insulation material
Source: Royal Society of Chemistry journal article supplement (doi:10.1039/d1ra04301c), 2021-01-01
Supplement: d1ra04301c1.pdf [file d1ra04301c1.pdf]

## Electronic Supplementary Information (ESI)

### Ethylene-Bridged Polysilsesquioxane/Hollow Silica Particles Hybrid Film for Thermal Insulation Material

Satoru Tsukada<sup>ab</sup>, Yuki Nakanishi<sup>ac</sup>, Takashi Hamada<sup>\*a</sup>, Kenta Okada<sup>ac</sup>, Susumu Mineoi<sup>ac</sup>  
and Joji Ohshita<sup>\*ade</sup>

<sup>a</sup>Collaborative Research Laboratory, Graduate School of Advanced Science and Engineering, Hiroshima University, 1-4-1 Kagamiyama, Higashi-Hiroshima, Hiroshima 739-8527, Japan

<sup>b</sup>Department of Materials Science, Graduate School of Engineering, Chiba University, 1-33 Yayoi-cho, Inage-ku, Chiba, 263-8522, Japan

<sup>c</sup>Technical Research Center, Mazda Motor Corporation, 3-1 Shinchu, Fuchu-cho, Aki-gun, Hiroshima 730-8670, Japan

<sup>d</sup>Smart Innovation Program, Graduate School of Advanced Science and Engineering, Hiroshima University, 1-4-1 Kagamiyama, Higashi-Hiroshima, Hiroshima 739-8527, Japan

<sup>e</sup>Division of Materials Model-Based Research, Digital Monozukuri (Manufacturing) Education and Research Center, Hiroshima University, 3-10-32 Kagamiyama, Higashi-Hiroshima, Hiroshima 739-0046, Japan

Corresponding authors: Takashi Hamada and Joji Ohshita

E-mail address: hama@hiroshima-u.ac.jp and jo@hiroshima-u.ac.jp

#### Contents

Fig. S1 Photograph of handmade thermal insulation property tester

Fig. S2 Thermogravimetric- and derivative thermogravimetric curves for EBPSQ film, hybrid 1-10, and hybrid 1-20 measured at a heating rate of 10 °C/min under air

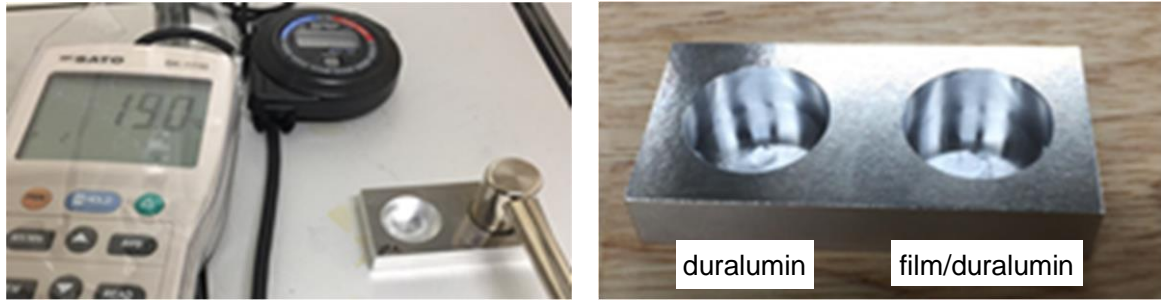

Fig. S1 Photograph of handmade thermal insulation property tester: surface thermometer (left) and duralumin plate (right).

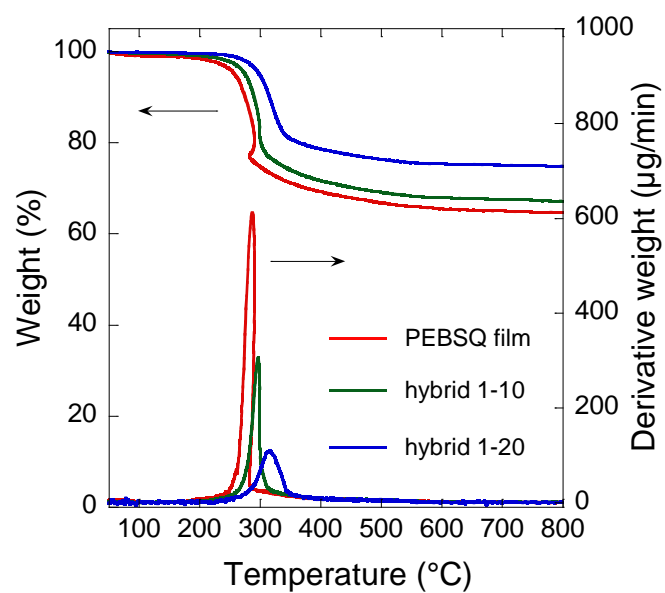

Fig. S2 Thermogravimetric- and derivative thermogravimetric curves for EBPSQ film, hybrid 1-10, and hybrid 1-20 measured at a heating rate of 10 °C/min under air.
